# Supplementary material for: Improving the broadband photocatalytic performance of TiO2 through a highly efficient optical converter
Source: Royal Society of Chemistry journal article supplement (doi:10.1039/d4tc02695k), 2024-01-01
Supplement: d4tc02695k1.pdf [file d4tc02695k1.pdf]

1

## Supporting Information

### 2 **Improving broadband photocatalytic performance of TiO<sub>2</sub>** 3 **through the highly efficient optical converter**

4 Guotao Xiang <sup>1, \*</sup>, Yuanyuan Yi <sup>1</sup>, Zhen Liu <sup>1</sup>, Yanhong Li <sup>1</sup>, Zhiyu Yang <sup>1</sup>,  
5 Yongjie Wang <sup>1</sup>, Sha Jiang <sup>1</sup>, Xiao Tang <sup>1</sup>, Xianju Zhou <sup>1</sup>, Li Li <sup>1</sup>, Xiaojun Wang <sup>3, \*</sup> and  
6 Jiahua Zhang <sup>2, \*</sup>

7 <sup>1</sup> *Department of Mathematics and Physics, Chongqing University of Posts and*  
8 *Telecommunications, 2 Chongwen Road, Chongqing 400065, China*

9 <sup>2</sup> *State Key Laboratory of Luminescence and Applications, Changchun Institute of Optics, Fine*  
10 *Mechanics and Physics, Chinese Academy of Sciences, 3888 Eastern South Lake Road, Changchun*  
11 *130033, China*

12 <sup>3</sup> *Department of Physics & Astronomy, Georgia Southern University, Statesboro, Georgia 30460,*  
13 *U.S.A.*

14 *Corresponding Authors:* Dr. Guotao Xiang; *Email address:* [xianggt@cqupt.edu.cn](mailto:xianggt@cqupt.edu.cn)

15 Dr. Jiahua Zhang; *Email address:* [zhangjh@ciomp.ac.cn](mailto:zhangjh@ciomp.ac.cn)

16 Dr. Xiaojun Wang; *Email address:* [xwang@georgiasouthern.edu](mailto:xwang@georgiasouthern.edu)

17

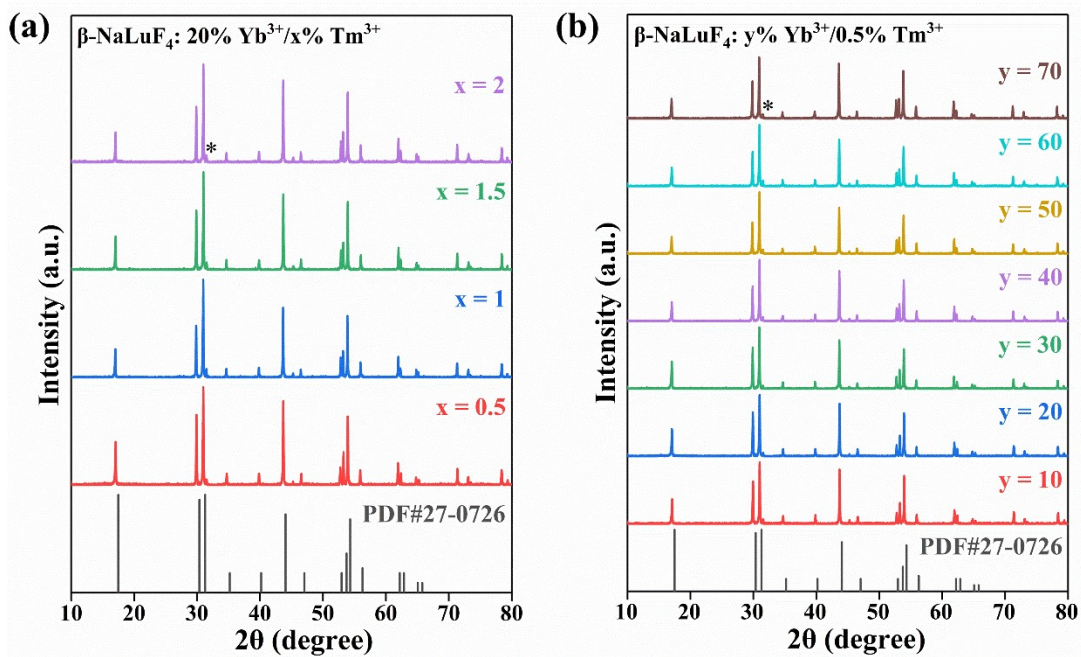

18

19 **Figure S1** XRD patterns of UCNPs doped with (a) 20%  $\text{Yb}^{3+}/x\% \text{Tm}^{3+}$  and (b)  $y\% \text{Yb}^{3+}/0.5\% \text{Tm}^{3+}$ .

20 The impurity NaCl is marked by asterisk (\*).

21

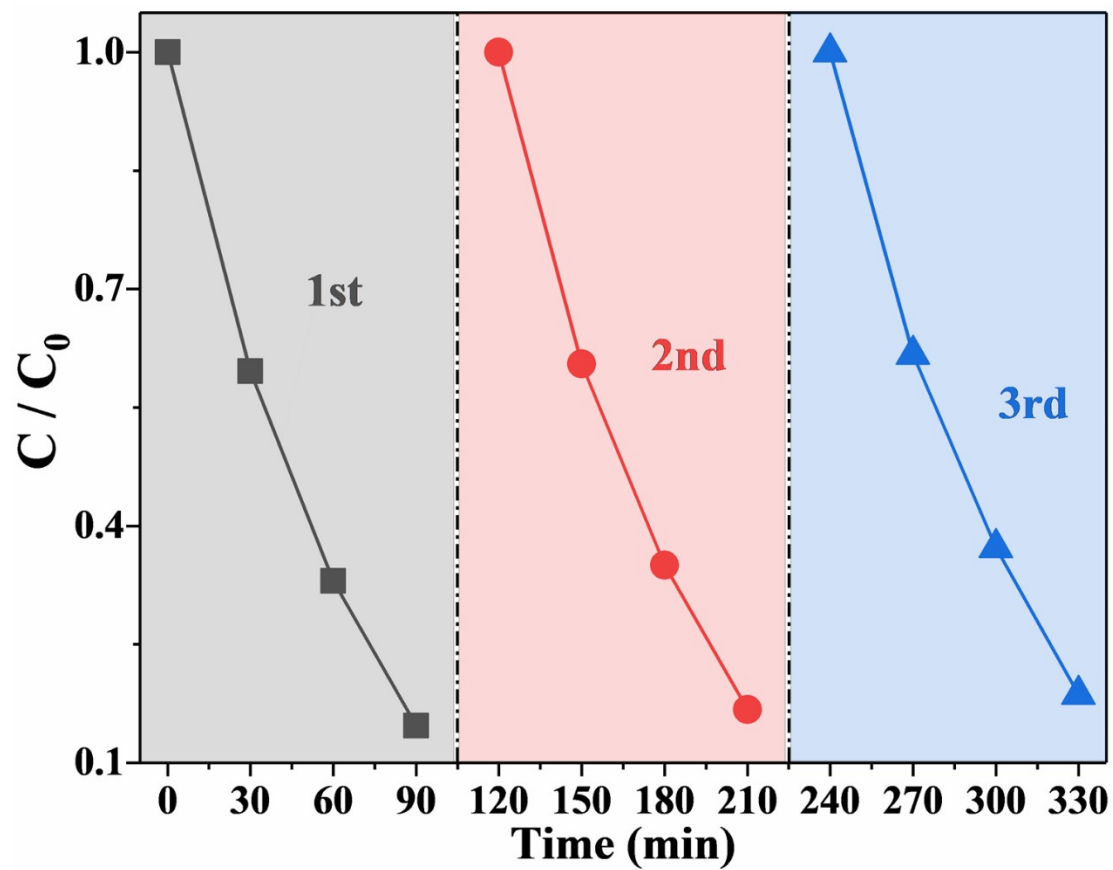

22

23 **Figure S2** Cyclic degradation performance of UCNPs@TiO<sub>2</sub> under the irradiation of simulated  
24 sunlight.

25

26 **Table S1** Key parameters of the typical NIR responsive photocatalysts driven by NIR light and  
27 simulated sunlight.

| Photocatalyst                                                                                                                             | Dye, Volume                | Light, Intensity | Degradation Efficiency | Degradation Rate       | Ref.      |
|-------------------------------------------------------------------------------------------------------------------------------------------|----------------------------|------------------|------------------------|------------------------|-----------|
| <b>Part A</b> Photocatalysts driven by NIR light                                                                                          |                            |                  |                        |                        |           |
| $\beta$ -NaLuF <sub>4</sub> : Yb <sup>3+</sup> /Tm <sup>3+</sup> @TiO <sub>2</sub>                                                        | RhB, 10 mg·L <sup>-1</sup> | 980 nm, 2 W      | 97%@10 h               | 0.2356 h <sup>-1</sup> | This work |
| $\beta$ -NaYF <sub>4</sub> : Yb <sup>3+</sup> /Tm <sup>3+</sup> @TiO <sub>2</sub>                                                         | RhB, 10 mg·L <sup>-1</sup> | 980 nm, 1 W      | 75.75%@24 h            | —                      | [1]       |
| Fe <sub>3</sub> O <sub>4</sub> @SiO <sub>2</sub> /β-NaYF <sub>4</sub> : Yb <sup>3+</sup> /Tm <sup>3+</sup> @TiO <sub>2</sub>              | RhB, 10 mg·L <sup>-1</sup> | 980 nm, 1 W      | 68.48%@24 h            | —                      | [2]       |
| $\beta$ -NaYF <sub>4</sub> : Yb <sup>3+</sup> /Tm <sup>3+</sup> @ZnO                                                                      | RhB, 20 mg·L <sup>-1</sup> | 980 nm, 2 W      | 65%@30 h               | —                      | [3]       |
| BiOBr: Yb <sup>3+</sup> /Er <sup>3+</sup> /Ho <sup>3+</sup>                                                                               | RhB, 10 mg L <sup>-1</sup> | 980 nm, 2 W      | 53%@6 h                | 0.099 h <sup>-1</sup>  | [4]       |
| NaYF <sub>4</sub> : Yb <sup>3+</sup> /Tm <sup>3+</sup> @NaYF <sub>4</sub> /TiO <sub>2</sub>                                               | RhB, —                     | 980 nm, 3 W      | 38%@6 h                | —                      | [5]       |
| $\beta$ -NaYF <sub>4</sub> : Yb <sup>3+</sup> /Tm <sup>3+</sup> @SiO <sub>2</sub> @TiO <sub>2</sub>                                       | RhB, —                     | 980 nm, 3 W      | 32%@6 h                | 0.0649 h <sup>-1</sup> | [6]       |
| <b>Part B</b> Photocatalysts driven by simulated sunlight                                                                                 |                            |                  |                        |                        |           |
| $\beta$ -NaLuF <sub>4</sub> : Yb <sup>3+</sup> /Tm <sup>3+</sup> @TiO <sub>2</sub>                                                        | RhB, 10 mg·L <sup>-1</sup> | Xe lamp, 300 W   | 78%@1.5 h              | 0.7572 h <sup>-1</sup> | This work |
| $\beta$ -NaYF <sub>4</sub> : Yb <sup>3+</sup> /Tm <sup>3+</sup> @NaYF <sub>4</sub> : Yb <sup>3+</sup> /Nd <sup>3+</sup> @TiO <sub>2</sub> | RhB, 40 mg·L <sup>-1</sup> | Xe lamp, 300 W   | 89%@3 h                | 0.6900 h <sup>-1</sup> | [7]       |
| $\beta$ -NaYF <sub>4</sub> : Yb <sup>3+</sup> /Tm <sup>3+</sup> @TiO <sub>2</sub>                                                         | RhB, 10 mg·L <sup>-1</sup> | Xe lamp, 1000 W  | 80%@4.5 h              | —                      | [8]       |
| NaBH <sub>4</sub> @ZrO <sub>2</sub> -OV                                                                                                   | RhB, 10 mg·L <sup>-1</sup> | Xe lamp, 300 W   | 80%@5 h                | —                      | [9]       |
| $\beta$ -NaYF <sub>4</sub> : Yb <sup>3+</sup> /Tm <sup>3+</sup> /Gd <sup>3+</sup> /NMC                                                    | RhB, 5 mg·L <sup>-1</sup>  | Xe lamp, 300 W   | 79%@1.5 h              | ~0.54 h <sup>-1</sup>  | [10]      |
| $\beta$ -NaYF <sub>4</sub> : Yb <sup>3+</sup> /Er <sup>3+</sup> /Ag <sub>2</sub> CrO <sub>4</sub>                                         | RhB, 10 mg·L <sup>-1</sup> | Xe lamp, 300 W   | 55%@2.5 h              | 0.3306 h <sup>-1</sup> | [11]      |

## 28 References

- 29 [1] D. X. Xu, Z. W. Lian, M. L. Fu, B. Yuan, J. W. Shi and H. J. Cui, *Appl. Catal. B-Environ.*,  
30 2013, **142**, 377-386.
- 31 [2] Z. Chen and M. L. Fu, *Mater. Res. Bull.*, 2018, **107**, 194-203.

- 32 [3] X. Guo, W. Song, C. Chen, W. Di and W. Qin, *Phys. Chem. Chem. Phys.*, 2013, **15(35)**, 14681-  
33 14688.
- 34 [4] Y. Li, Z. Cheng, L. Yao, S. Yang and Y. Zhang, *Acs Sustain. Chem. Eng.*, 2019, **7(21)**, 18185-  
35 18196.
- 36 [5] F. Zhang, C. L. Zhang, H. Y. Peng, H. P. Cong and H. S. Qian, *Part. Part. Syst. Char.*, 2016,  
37 **33(5)**.
- 38 [6] W. Wang, W. Huang, Y. Ni, C. Lu and Z. Xu, *Acs Appl. Mater. Inter.*, 2014, **6(1)**, 340-348.
- 39 [7] H. Huang, H. Li, Z. Wang, P. Wang, Z. Zheng, Y. Liu, Y. Dai, Y. Li and B. Huang, *Chem.*  
40 *Eng. J.*, 2019, **361**, 1089-1097.
- 41 [8] S. Duo, J. Zhang, H. Zhang, C. Chen, C. Zhong and T. Liu, *Opt. Mater.*, 2016, **62**, 240-249.
- 42 [9] Y. Qin, Z. Ding, W. Guo, X. Guo, C. Hou, B. Jiang, C. Liu and X. Shen, *Acs Sustain. Chem.*  
43 *Eng.*, 2020, **8(34)**, 13039-13047.
- 44 [10] J. Jiang, H. Ren, F. Huang, L. Wang and J. Zhang, *Crystengcomm.*, 2021, **23(35)**, 6117-6127.
- 45 [11] K. Zhang, M. Zhou, C. Yu, K. Yang, X. Li, S. Yang, J. Guan, W. Dai and W. Huang, *J. Mater.*  
46 *Sci.*, 2020, **55**, 10435-10452.
- 47

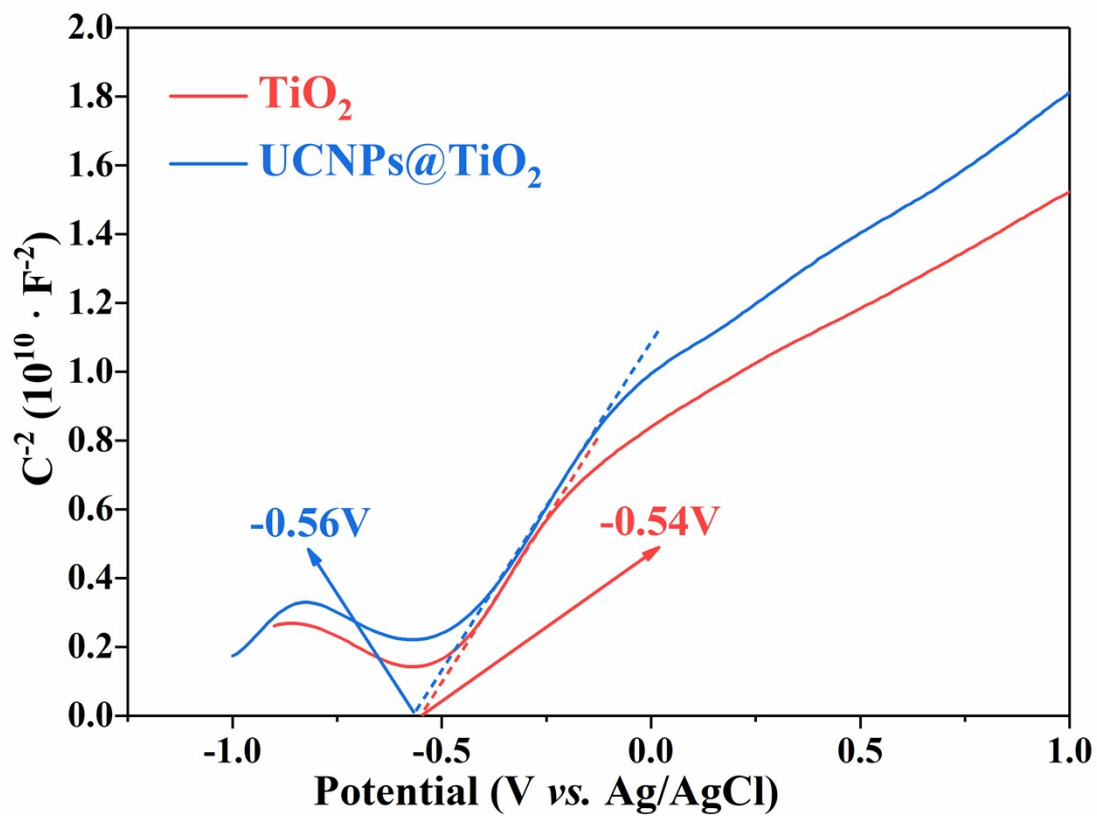

48

49 **Figure S3** Mott-Schottky plots of anatase  $\text{TiO}_2$  and  $\text{UCNPs@TiO}_2$  vs. Ag/AgCl electrode.

50

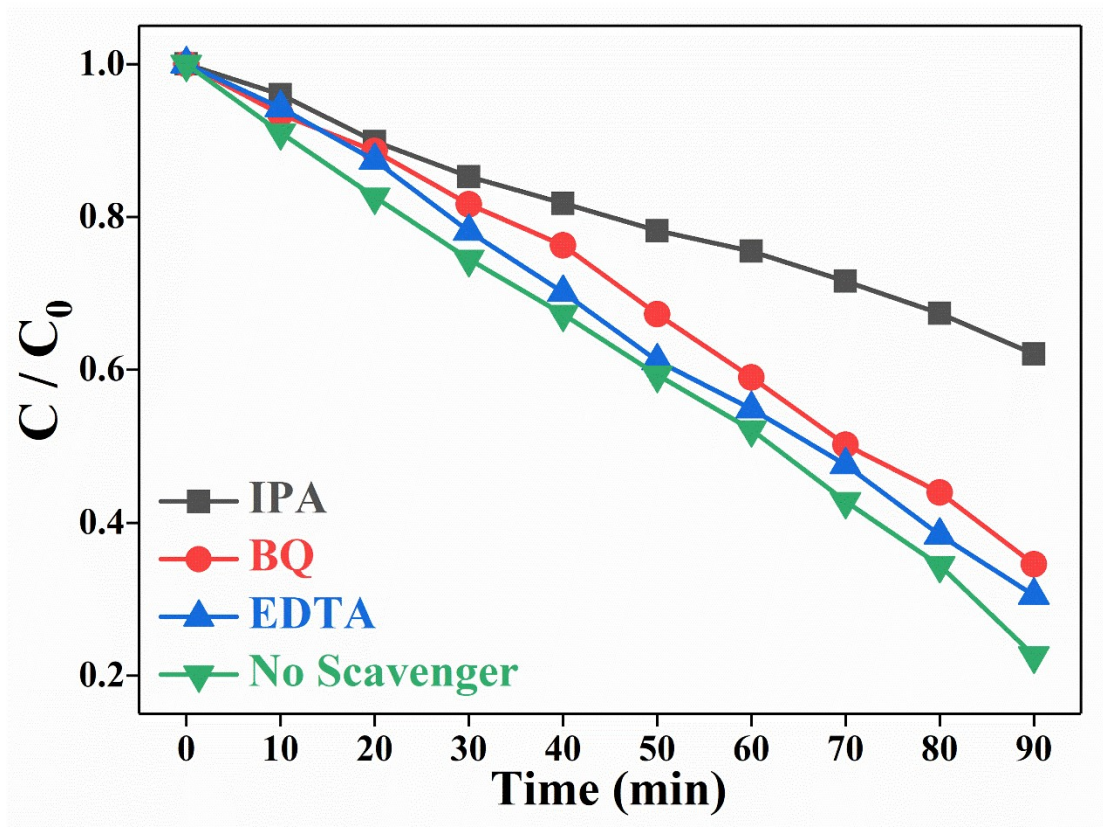

51

52 **Figure S4** Photocatalytic performance of UCNPs@TiO<sub>2</sub> mixed with various scavenger under the  
 53 irradiation of simulated sunlight.
